# Supplementary material for: Atomic force microscopy identifies the alteration of rheological properties of the cardiac fibroblasts in idiopathic restrictive cardiomyopathy
Source: PubMed Central journal article supplement (PMC9522286; doi:10.1371/journal.pone.0275296), 2022-09-29

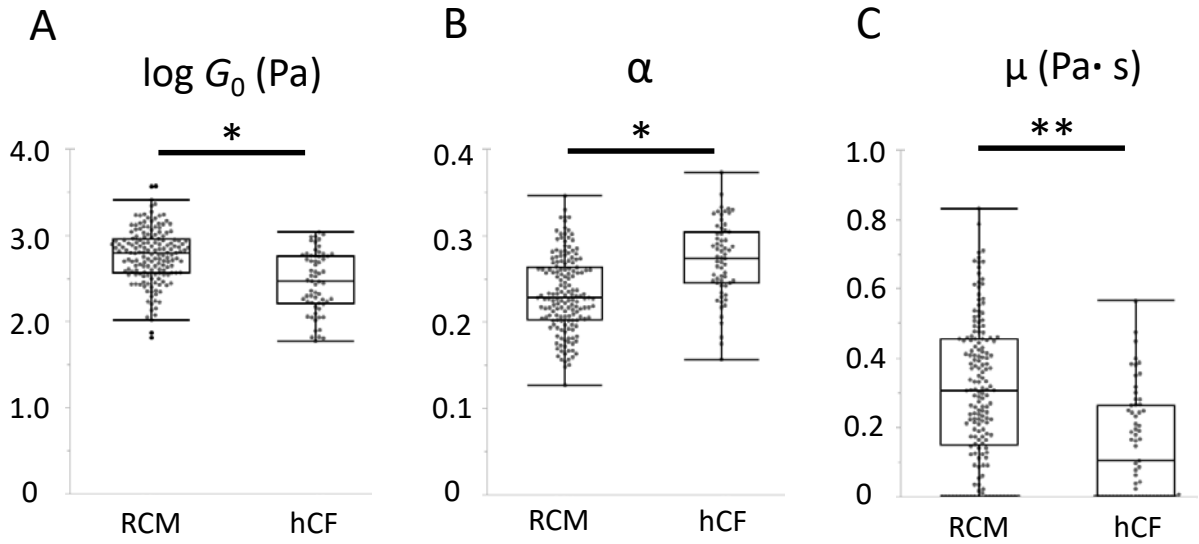

Supplement: pone.0275296.s001.pdf [file pone.0275296.s001.pdf]
